# Supplementary material for: Variations in greenhouse gas emissions of individual diets: Associations between the greenhouse gas emissions and nutrient intake in the United Kingdom
Source: PubMed Central journal article supplement (PMC8610494; doi:10.1371/journal.pone.0259418), 2021-11-23
Supplement: pone.0259418.s001.pdf [file pone.0259418.s001.pdf]

**Supplementary table 1· Mean (95% CI) and percent contributions of different types of food to greenhouse gas emissions from diet by age, gender, body mass index and vegetarian status (kg CO<sub>2</sub>eq/day)**

|                             | Total                 | Sex                   |                       | Age                   |                       | BMI                   |                       | Vegetarian status     |                       |
|-----------------------------|-----------------------|-----------------------|-----------------------|-----------------------|-----------------------|-----------------------|-----------------------|-----------------------|-----------------------|
|                             |                       | Female                | Male                  | <40 years             | 40+ years             | <25 kg/m <sup>2</sup> | 25+ kg/m <sup>2</sup> | Vegetarian            | Non-vegetarian        |
| <b>Meat</b>                 | 3·1 (2·5, 3·7)<br>32% | 2·1 (1·6, 2·6)<br>27% | 4·6 (3·3, 6·0)<br>38% | 4·2 (2·9, 5·5)<br>37% | 2·3 (1·8, 2·9)<br>27% | 2·8 (1·9, 3·7)<br>29% | 3·4 (2·5, 4·3)<br>34% | 0·1 (0·0, 0·3) 2%     | 3·3 (2·6, 4·0)<br>34% |
| <b>Fish</b>                 | 0·5 (0·4, 0·6) 7%     | 0·5 (0·3, 0·6) 8%     | 0·5 (0·3, 0·7) 6%     | 0·4 (0·3, 0·6) 6%     | 0·5 (0·4, 0·7) 8%     | 0·4 (0·3, 0·6) 7%     | 0·6 (0·4, 0·8) 8%     | 0·2 (0·0, 0·5) 3%     | 0·5 (0·4, 0·6) 7%     |
| <b>Dairy</b>                | 0·9 (0·8, 0·9)<br>14% | 0·8 (0·7, 0·9)<br>15% | 0·9 (0·8, 1·1)<br>13% | 0·7 (0·6, 0·8)<br>12% | 1·0 (0·8, 1·1)<br>15% | 0·8 (0·7, 0·9)<br>15% | 0·9 (0·8, 1·0)<br>14% | 0·9 (0·6, 1·2)<br>22% | 0·9 (0·8, 1·0)<br>14% |
| <b>Grains</b>               | 0·3 (0·3, 0·5) 4%     | 0·2 (0·2, 0·3) 4%     | 0·3 (0·2, 0·4) 4%     | 0·3 (0·3, 0·4) 5%     | 0·2 (0·2, 0·3) 4%     | 0·3 (0·2, 0·3) 4%     | 0·3 (0·2, 0·3) 4%     | 0·3 (0·1, 0·4) 7%     | 0·3 (0·2, 0·3) 4%     |
| <b>Fruit and vegetables</b> | 0·4 (0·3, 0·5) 7%     | 0·4 (0·3, 0·5) 7%     | 0·4 (0·3, 0·5) 6%     | 0·3 (0·2, 0·3) 5%     | 0·5 (0·4, 0·6) 8%     | 0·4 (0·3, 0·5) 7%     | 0·4 (0·3, 0·5) 6%     | 0·5 (0·3, 0·8)<br>13% | 0·4 (0·3, 0·5) 6%     |
| <b>Drinks</b>               | 1·0 (0·9, 0·7)<br>15% | 0·8 (0·7, 0·9)<br>15% | 1·3 (1·0, 1·5)<br>16% | 0·9 (0·7, 1·0)<br>13% | 1·1 (0·9, 1·3)<br>17% | 0·9 (0·7, 1·1)<br>15% | 1·1 (0·9, 1·2)<br>15% | 1·0 (0·5, 1·5)<br>21% | 1·0 (0·9, 1·1)<br>15% |
| <b>Sweet snacks</b>         | 0·6 (0·5, 0·7) 8%     | 0·6 (0·4, 0·7) 9%     | 0·5 (0·4, 0·7) 7%     | 0·6 (0·4, 0·8) 9%     | 0·5 (0·4, 0·6) 8%     | 0·6 (0·4, 0·8)<br>10% | 0·5 (0·4, 0·6) 7%     | 0·3 (0·1, 0·4) 6%     | 0·6 (0·5, 0·7) 9%     |
| <b>Other</b>                | 0·7 (0·6, 0·8)<br>11% | 0·7 (0·5, 0·9)<br>12% | 0·7 (0·5, 0·8)<br>10% | 0·8 (0·5, 1·0)<br>13% | 0·6 (0·5, 0·8)<br>11% | 0·7 (0·6, 0·8)<br>12% | 0·7 (0·5, 0·9)<br>11% | 1·2 (0·1, 2·4)<br>24% | 0·7 (0·6, 0·8)<br>11% |
